# Supplementary material for: Lactiplantibacillus plantarum P101 Attenuated Cyclophosphamide-Induced Liver Injury in Mice by Regulating the Nrf2/ARE Signaling Pathway
Source: MDPI journal article supplement (doi:10.3390/ijms241713424), 2023-08-30
Supplement: s1 [file s1]

## **Supplementary material**

### ***Lactiplantibacillus plantarum* P101 attenuated cyclophosphamide-induced liver injury in mice by regulating Nrf2/ARE signaling pathway**

*Tao You, Yu Zhao, Shanji Liu, Hengyi Xu\**

State Key Laboratory of Food Science and Resources, Nanchang University, Nanchang 330047, China.

\*Correspondence to:

**Dr. Hengyi Xu**

State Key Laboratory of Food Science and Resources, Nanchang University.

Address: 235 Nanjing East Road, Nanchang 330047, P. R. China.

Phone: +0086-791-8830-4447-ext-9520.

Fax: +0086-791-8830-4400.

E-mail: kidyxu@163.com, HengyiXu@ncu.edu.cn.

**Table S1.** List of genes and primers used in this study.

| Gene           | Primer  | Sequence (5'→3')           |
|----------------|---------|----------------------------|
| <i>Nrf2</i>    | Forward | ACTTCGGTGATTCTGTTAG        |
|                | Reverse | CTCGTGCTCGCTTACT           |
| <i>NQO1</i>    | Forward | AGGATGGGAGGTACTCGAATC      |
|                | Reverse | TGCTAGAGATGACTCGGAAGG      |
| <i>Keap-1</i>  | Forward | GAAGAGGCGGCAGAAGAAG        |
|                | Reverse | GCTCCAGGGCTATGACAGAT       |
| <i>HO-1</i>    | Forward | ACCGCCTTCCTGCTCAAC         |
|                | Reverse | GAGGAGCGGTGTCTGGGAT        |
| <i>CAT</i>     | Forward | TTGTTCAGTGACCGAGGGATT      |
|                | Reverse | TTCCTGAGCAAGCCTTCCTG       |
| <i>SOD-1</i>   | Forward | TAACTGAAGGCCAGCATGGGT      |
|                | Reverse | GGTCTCCAACATGCCTCTCTTC     |
| <i>SOD-2</i>   | Forward | CAGACCTGCCTTACGACTATGG     |
|                | Reverse | GCTGAAGAGCGACCTGAGTTGT     |
| <i>Gclc</i>    | Forward | ATGTGGACACCCGATGCAGTATT    |
|                | Reverse | TGTCTTGCTTGTAGTCAGGATGGTTT |
| <i>Gclm</i>    | Forward | CTTCGCCTCCGATTGAAGATG      |
|                | Reverse | AAAGGCAGTCAAATCTGGTGG      |
| <i>IL-10</i>   | Forward | TAACTGCACCCACTTCCCAG       |
|                | Reverse | AAGGCTTGGCAACCCAAGTA       |
| <i>Bax</i>     | Forward | GATGGCAACTTCAACTGGG        |
|                | Reverse | CCGAAGTAGGAGAGGAGGC        |
| <i>Bcl2</i>    | Forward | CACTCGACCTTGTTTCTTCCAG     |
|                | Reverse | TCCTAACCCCTTGCTCTGCTT      |
| <i>β-actin</i> | Forward | GCTCCTCCTGAGCGCAAGTA       |
|                | Reverse | CAGCTCAGTAACAGTCCGCC       |
